# Supplementary material
Source: PubMed Central journal article supplement (PMC5027988)
Supplement: NIHMS803171-supplement-3.pdf [file NIHMS803171-supplement-3.pdf]

## Supplementary Figures

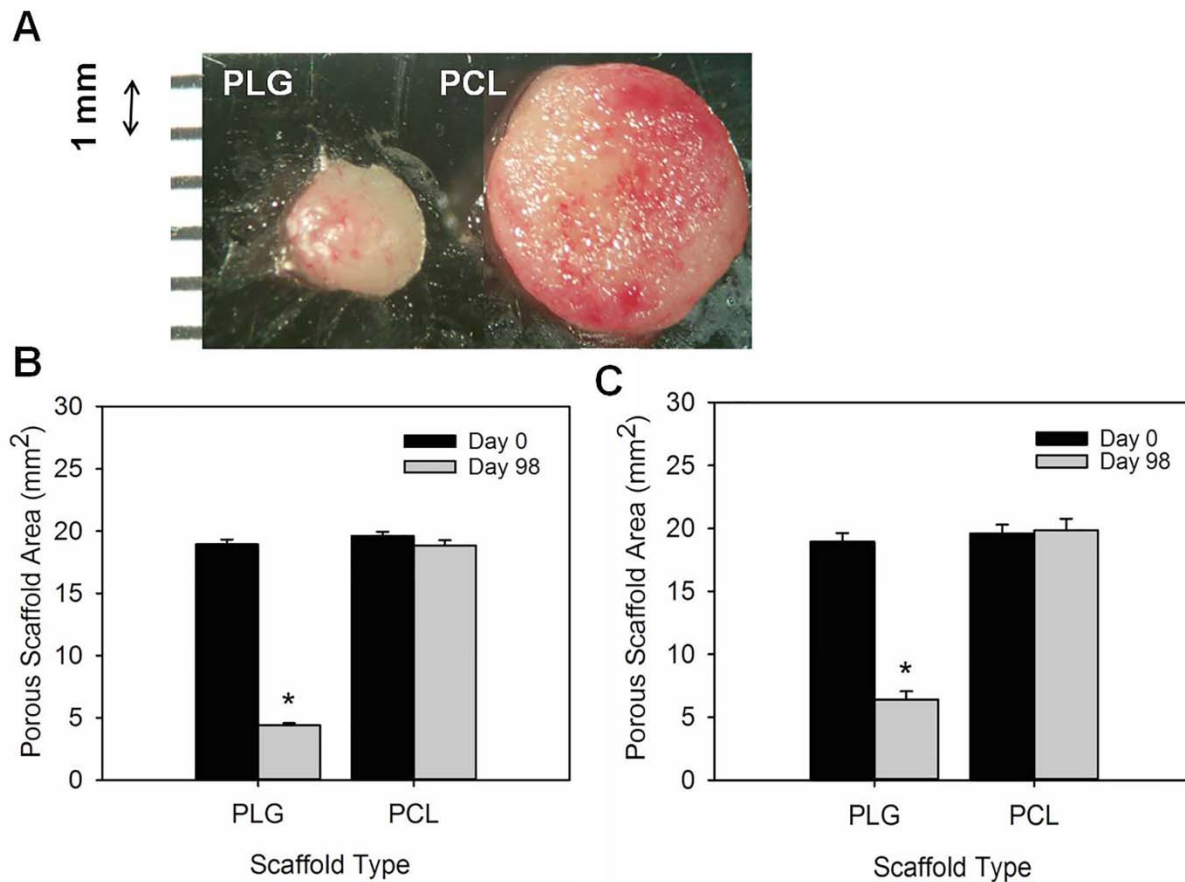

**Figure S1:** Micro-porous PCL scaffolds persist and maintain a space for extended times *in vivo*.

(A) Representative photomicrographs of micro-porous PLG and PCL scaffolds retrieved from tumor free BALB/c mice at day 98 post scaffold implantation. Average scaffold area at day 0 versus day 98 for PLG and PCL scaffolds when tested in a BALB/c (B) and NSG (C) mouse model. N = 4; \*p < 0.0001 compared to day 0 for PLG scaffolds in BALB/c and NSG mouse; p = 0.22 compared to day 0 for PCL scaffolds in BALB/c mouse and p = 0.7 compared to day 0 for PCL scaffolds in NSG mouse as determined by t-test. Scaffold area was calculated using dimensions obtained from images of scaffolds taken at day 0 and day 98 post implantation using Image J software (<http://imagej.nih.gov/ij/>). Error bars denote s.e.m.

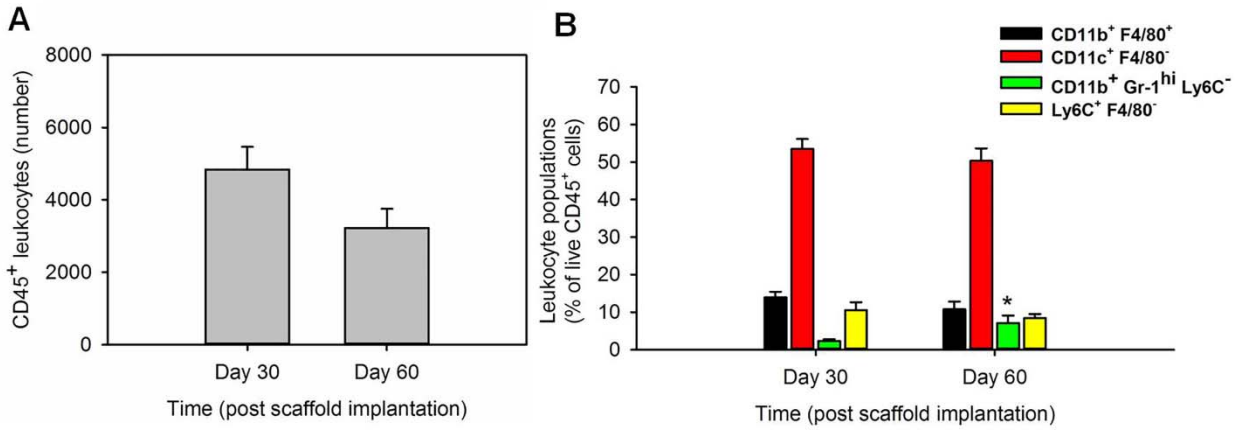

**Figure S2:** Host response following implantation of micro-porous PCL scaffolds in the dorsal subcutaneous space of an NSG mouse *in vivo*. (A) CD45<sup>+</sup> leukocyte numbers and (B) Dynamics of CD11b<sup>+</sup>F4/80<sup>+</sup>, CD11c<sup>+</sup>F4/80<sup>-</sup>, CD11b<sup>+</sup>Gr-1<sup>hi</sup>Ly6C<sup>-</sup>, and Ly6C<sup>+</sup>F4/80<sup>-</sup> populations expressed as a percentage of live CD45<sup>+</sup> leukocytes at day 30 and day 60 post PCL scaffold implantation (N ≥ 8 for each time point examined, \*p < 0.05 compared to day 30 as determined by t-test). The relative distribution of immune cell populations was nearly identical between day 30 and day 60 post scaffold implantation. Error bars denote s.e.m.

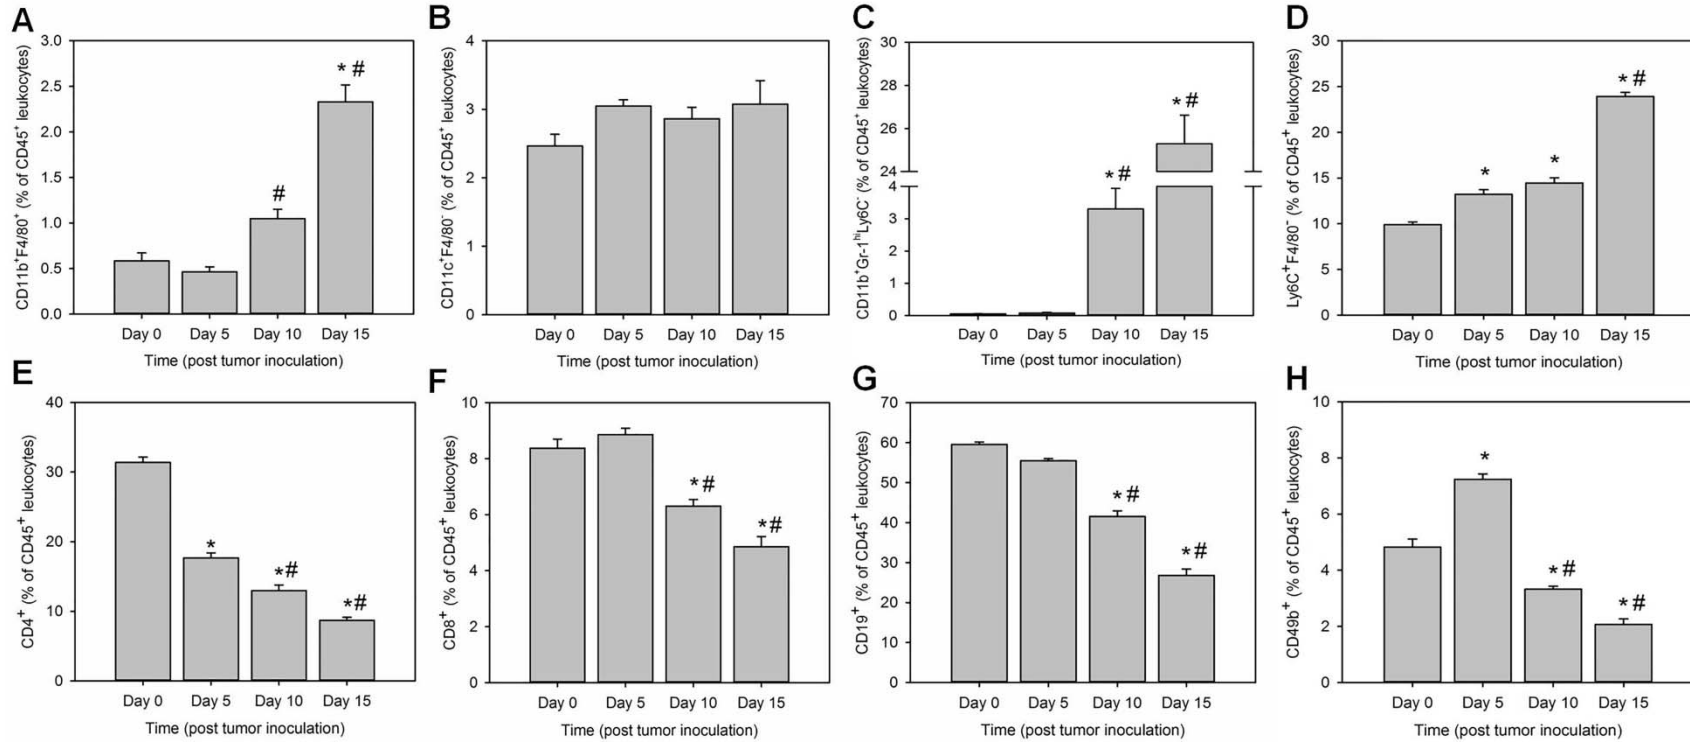

**Figure S3:** Dynamics of immune cell populations in the spleen of BALB/c mice with a PCL scaffold implant at day 0, 5, 10, and 15 post tumor inoculation. Percentage of (A) CD11b<sup>+</sup>F4/80<sup>+</sup> (B) CD11c<sup>+</sup>F4/80<sup>-</sup> (C) CD11b<sup>+</sup>Gr-1<sup>hi</sup>Ly6C<sup>-</sup> (D) Ly6C<sup>+</sup>F4/80<sup>-</sup> innate immune cell populations and percentage of (E) CD4<sup>+</sup> (F) CD8<sup>+</sup> (G) CD19<sup>+</sup> and (H) CD49b<sup>+</sup> adaptive immune cell populations in the total population of live CD45<sup>+</sup> leukocytes. (N ≥ 5 for each time point examined, \*p < 0.05 compared to day 0 and #p < 0.05 compared to day 5 as determined by Tukey-HSD test post ANOVA). Error bars denote s.e.m.

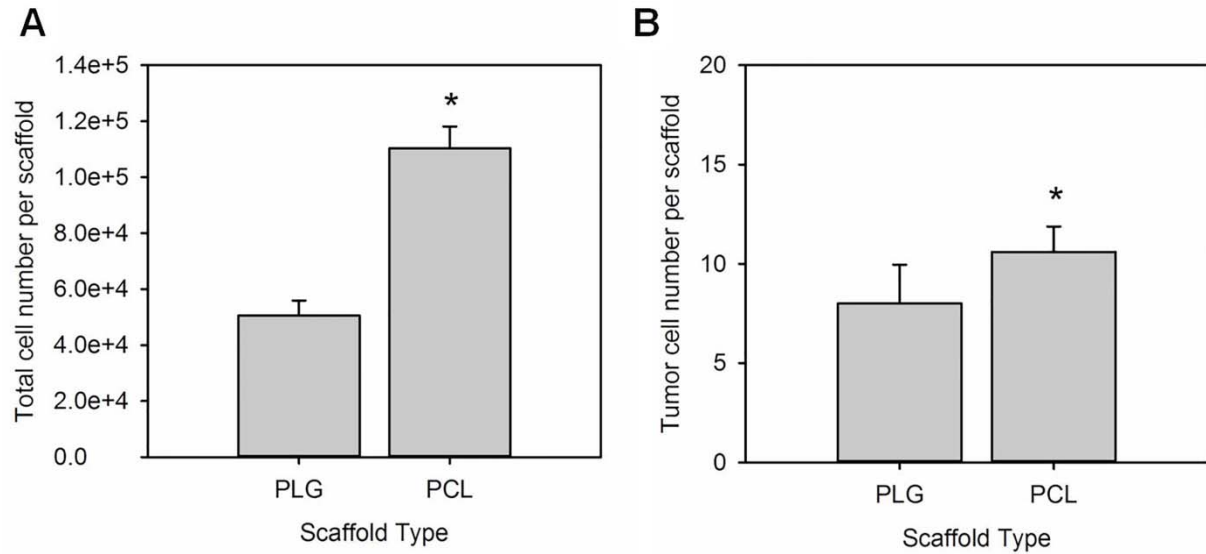

**Figure S4:** Micro-porous PCL scaffolds enable recruitment of human MDA-MD-231BR cells in a chronic model of scaffold implantation. (A) Total cell infiltration and (B) Tumor cell infiltration in PLG and PCL micro-porous scaffolds. Scaffolds were retrieved at day 15 post tumor inoculation, which was performed 1 month post scaffold implantation (N = 10 for each group, \* $p < 0.05$  as determined by t-test for analysis of total cell numbers and Wilcoxon rank-sum test for tumor cell numbers). Error bars denote s.e.m.

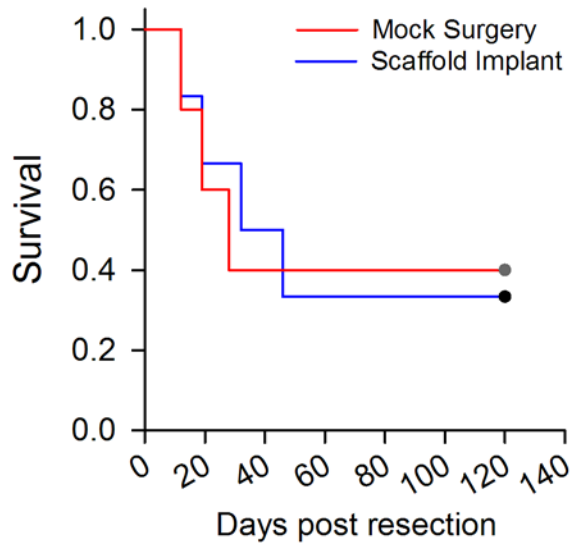

**Figure S5:** Micro-porous PCL scaffolds do not significantly improve survival in a post-surgical model of breast cancer metastasis with day 6 post tumor inoculation resection. ( $N \geq 5$  for each group).

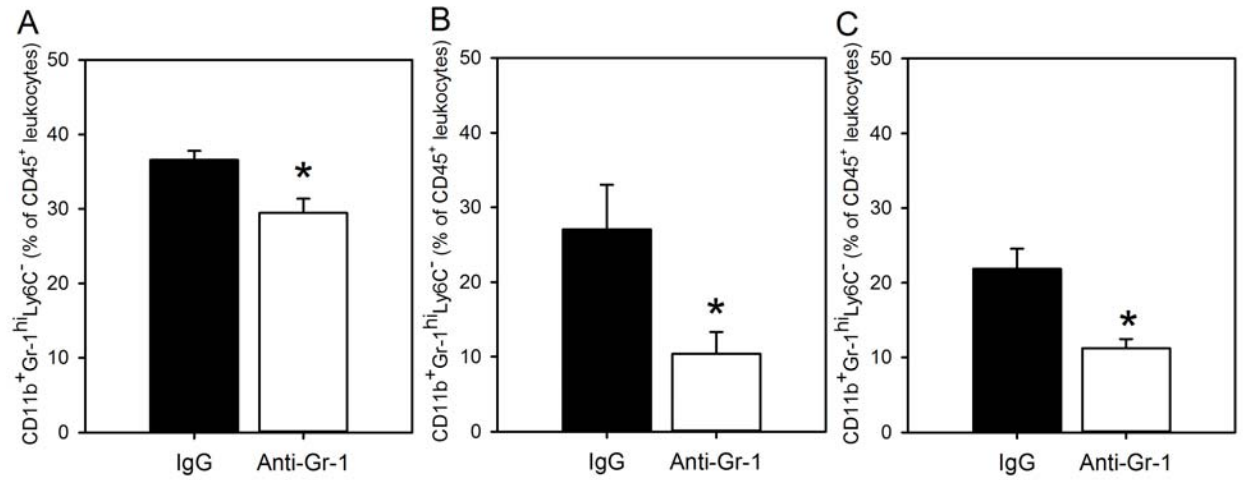

**Figure S6:** Anti-Gr-1 depletion significantly reduces the presence of CD11b<sup>+</sup>Gr-1<sup>hi</sup>Ly6C<sup>-</sup> MDSCs in the spleen (A) primary tumor (B) and scaffold (C). The percentage of CD11b<sup>+</sup>Gr-1<sup>hi</sup>Ly6C<sup>-</sup> cells in the CD45<sup>+</sup> leukocyte population was examined via flow cytometry at day 15 post tumor inoculation after three 300 μg antibody injections (day 5, 9, 13) (N=5 for spleen and primary tumor, N = 10 for scaffolds, performed in one experiment \*p<0.05 as determined using t-test.) Error bars denote s.e.m.
